# Supplementary material for: The ability of supercritical CO2carrot and pumpkin extracts to counteract inflammation and oxidative stress in RAW 264.7 macrophages stimulated with LPS or MDA-MB-231 cell-conditioned media
Source: Royal Society of Chemistry journal article supplement (doi:10.1039/d3fo03159d), 2023-01-01

**Supplementary Table1:** Real-Time PCR primers sequences. **TNF- $\alpha$** : tumor necrosis factor- $\alpha$ ; **IL-6**: interleukin-6; **IL-1 $\beta$** : interleukin-1 $\beta$ ; **Nrf2**: nuclear factor erythroid 2-related factor 2; **HO-1**: hemeoxygenase-1; **GPx**: glutathione peroxidase; **CAT**: catalase; **18S**: 18S rRNA.

| Primer                         | Sequence                           |
|--------------------------------|------------------------------------|
| <b>TNF-<math>\alpha</math></b> | <b>Fw</b> CAGGCGGTGCCTATGTCTC      |
|                                | <b>Rev</b> CGATCACCCCGAAGTTCAGTAG  |
| <b>IL-6</b>                    | <b>Fw</b> CTGCAAGAGACTTCCATCCAG    |
|                                | <b>Rev</b> AGTGGTATAGACAGGTCTGTTGG |
| <b>IL-1<math>\beta</math></b>  | <b>Fw</b> GAAATGCCACCTTTTGACAGTG   |
|                                | <b>Rev</b> TGGATGCTCTCATCAGGACAG   |
| <b>Nrf2</b>                    | <b>Fw</b> AGCAGGACATGGAGCAAGTT     |
|                                | <b>Rev</b> TTCTTTTTCCAGCGAGGAGA    |
| <b>HO-1</b>                    | <b>Fw</b> TTACCTTCCCGAACATCGAC     |
|                                | <b>Rev</b> GCATAAATTCCCACTGCCAC    |
| <b>GPx</b>                     | <b>Fw</b> CCTCAAGTACGTCCGACCTG     |
|                                | <b>Rev</b> CCATGTCGTTGCGGCACACC    |
| <b>CAT</b>                     | <b>Fw</b> GCAGATACCTGTGAACTGTC     |
|                                | <b>Rev</b> GTAGAATGTCCGCACCTGAG    |
| <b>18S</b>                     | <b>Fw</b> AGTCGGAGGTTCGAAGACGAT    |
|                                | <b>Rev</b> GCGGGTCATGGGAATAACG     |

**Supplementary Figure 1.** Nitrites production assessment in RAW 264.7 exposed to untreated (Control<sub>CM</sub>) and treated MDA-MB-231 conditioned medium. Values represent mean  $\pm$  S.D. of three independent experiments, each one performed with triplicate samples.

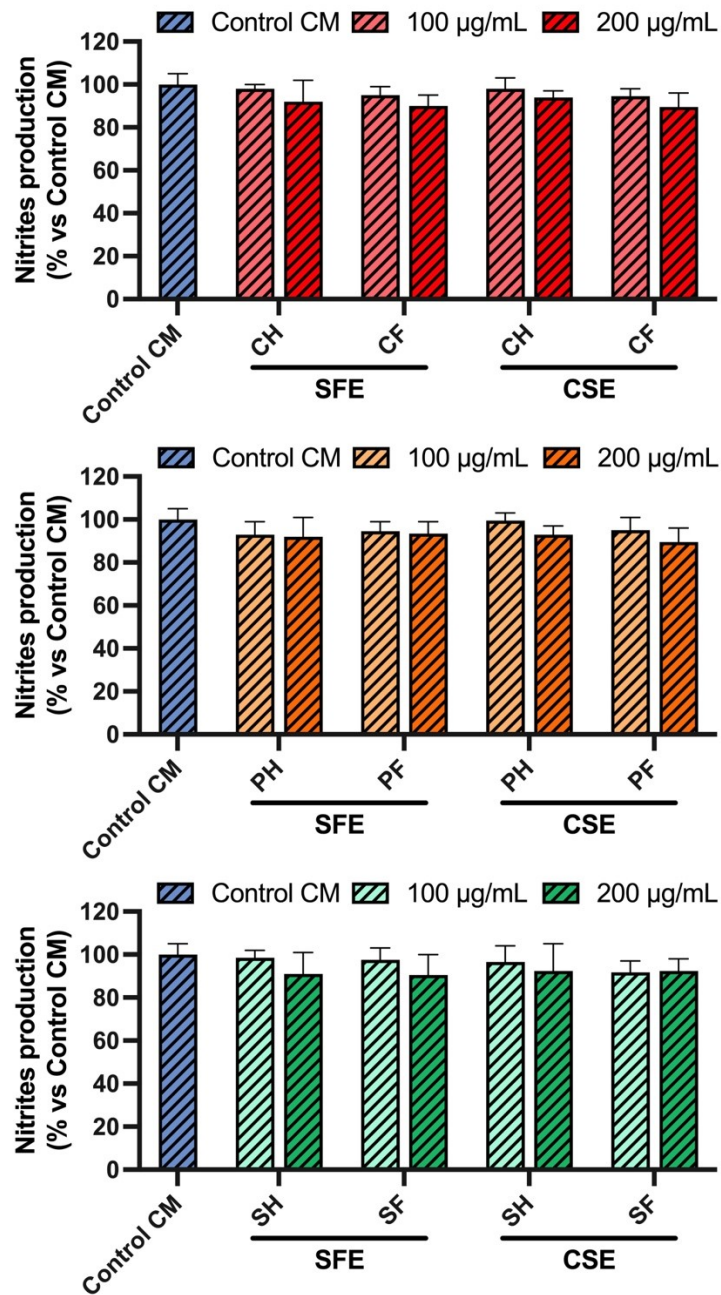

**Supplementary Figure 2.** Correlation matrix for extract components and cell responses. Blueish tones indicate higher positive correlations, whereas reddish tones point towards negative correlations; a red circle indicates a negative one. Larger circle diameters denote higher modules of the correlation coefficient (r). Non-significant correlations are shown as white intersections (significance was set at  $p \leq 0.05$ ).

$\alpha$ -T3,  $\alpha$ -tocotrienols;  $\beta$ -T,  $\beta$ -tocopherols;  $\alpha$ -T,  $\alpha$ -tocopherols; TT, total tocopherols; LUT, lutein; ZEA, Zeaxanthin; 9z- $\beta$ CRT, 9-cis- $\beta$ -carotene;  $\alpha$ -CRT,  $\alpha$ -carotene;  $\beta$ -CRT,  $\beta$ -carotene; 13z- $\beta$ CRT, 13-cis- $\beta$ -carotene; TCDS, total carotenoids; TT/TCDS, total tocopherols/total carotenoids ratio; CS, campesterol; SS, stigmasterol;  $\beta$ -SIS,  $\beta$ -sitosterol; TS, total sterols;  $\alpha$ -AMY,  $\alpha$ -amyrin;  $\beta$ -AMY,  $\beta$ -amyrin; TA, total amyrin; MA, myristic acid (C14:0); PDA, pentadecanoic acid (C15:0); PA, palmitic acid (C16:0); MGA, margaric acid (C17:0); SA, stearic acid (C18:0); AA, arachidic acid (C20:0); BA, Behenic acid (C22:0); HDA, 7-hexadecenoic acid (C16:1); PLA, palmitoleic acid (C16:1); OA, Oleic acid (C18:1n9c); VA, vaccenic acid (C18:1n7); GA, gondoic acid (C20:1); LA, linoleic acid (C18:2n6c); GLA,  $\gamma$ -linolenic acid (C18:3n6); ALA,  $\alpha$ -linolenic acid (C18:3n3); SDA, stearidonic acid (C18:4n3); ETE, eicosatrienoic acid (C20:3n7); SFA, saturated fatty acids; MUFA, monounsaturated fatty acids; PUFA, polyunsaturated fatty acids; NP<sub>LPS</sub>, nitrite production LPS-stimulated; ROS, Intracellular ROS, levels; NP<sub>cm</sub>, nitrite production conditioned medium; 100 and 200 are extract concentrations expressed as  $\mu\text{g/mL}$  of cell culture medium.

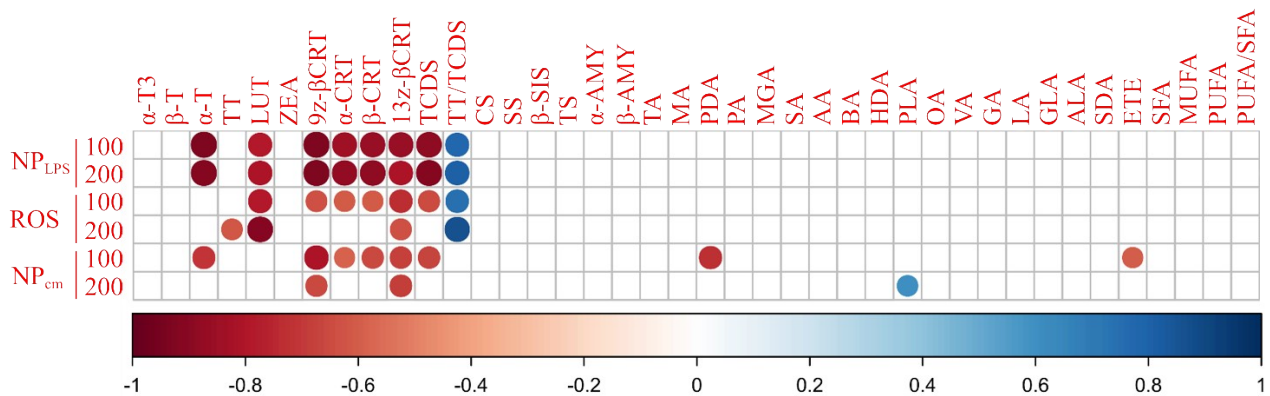

Supplement: d3fo03159d3.pdf [file d3fo03159d3.pdf]
