# Supplementary figures and images for: The ability of supercritical CO2carrot and pumpkin extracts to counteract inflammation and oxidative stress in RAW 264.7 macrophages stimulated with LPS or MDA-MB-231 cell-conditioned media
Source: Royal Society of Chemistry journal article supplement (doi:10.1039/d3fo03159d), 2023-01-01

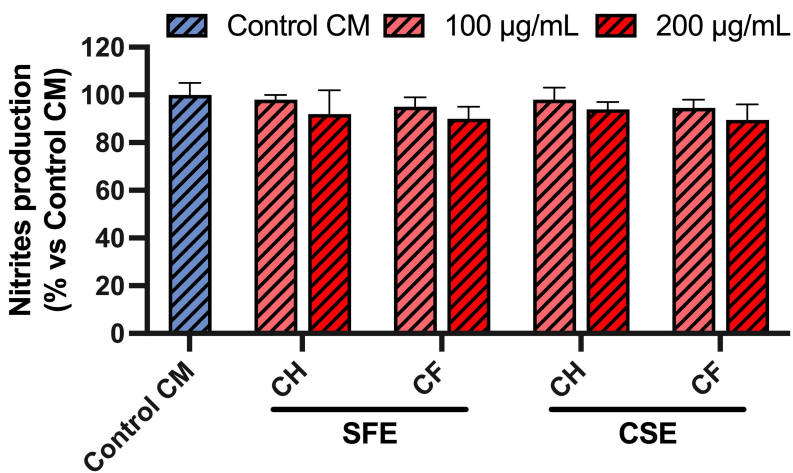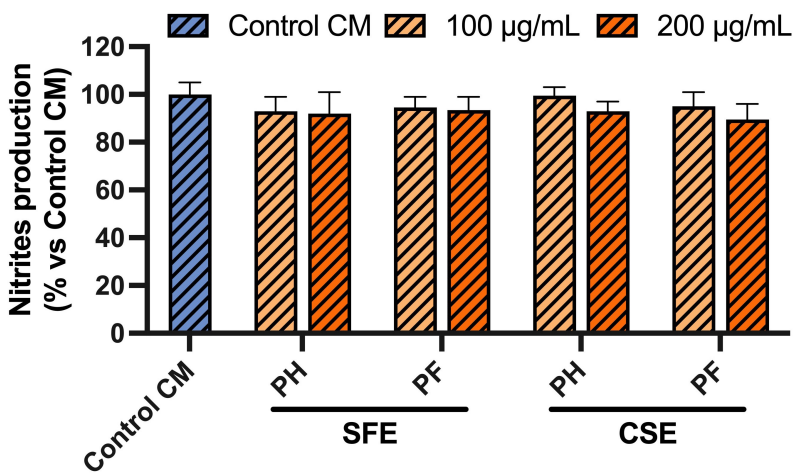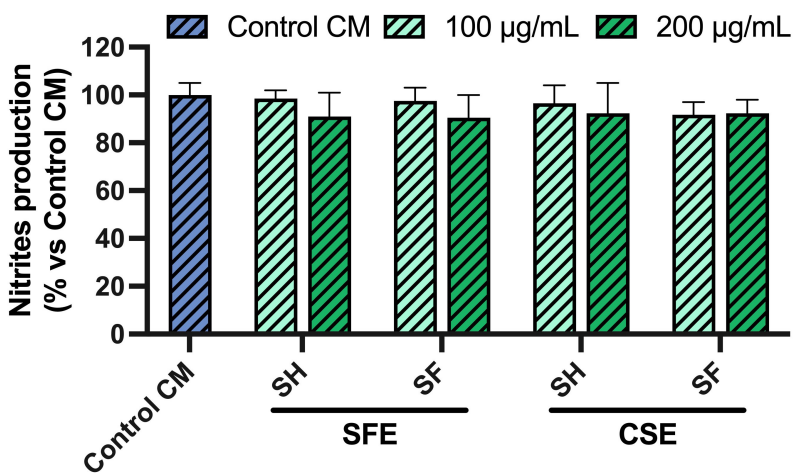

Supplement: d3fo03159d1.pdf [file d3fo03159d1.pdf]

kDa

270 —  
175 —  
130 —  
95 —  
66 —

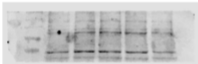

— Nrf2

52 —  
37 —  
30 —

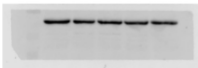

—  $\beta$ -Actin

Control | CH | CF | CH | CF  
SFE | CSE

Supplement: d3fo03159d2.pdf [file d3fo03159d2.pdf]
